# Supplementary material
Source: PubMed Central journal article supplement (PMC8120139)
Supplement: 10.1182-2020009779_bloodbld2020009779-suppl1.pdf [file 10.1182-2020009779_bloodbld2020009779-suppl1.pdf]

## Supplemental material to:

P-selectin deficiency promotes liver senescence in sickle cell disease mice

Ravi Vats<sup>1,4</sup>, Tomasz W Kaminski<sup>1</sup>, Eun-Mi Ju<sup>1</sup>, Tomasz Brozka<sup>1,3</sup>, Egemen Tutuncuoglu<sup>1</sup>,  
Jesus Tejero<sup>1,2</sup>, Enrico M Novelli<sup>1,3,5</sup>, Prithu Sundd<sup>1,2,4,5\*</sup> and Tirthadipa Pradhan-Sundd<sup>1,3,5\*</sup>

### Affiliations:

1. Pittsburgh Heart, Lung and Blood Vascular Medicine Institute, University of Pittsburgh School of Medicine, Pittsburgh, PA.
2. Division of Pulmonary Allergy and Critical Care Medicine, University of Pittsburgh School of Medicine, Pittsburgh, PA
3. Division of Hematology-Oncology, University of Pittsburgh School of Medicine, Pittsburgh, PA
4. Department of Bioengineering, University of Pittsburgh, Pittsburgh, PA
5. Sickle Cell Center of Excellence, University of Pittsburgh School of Medicine, Pittsburgh, PA.

\*To whom correspondence should be addressed:

Tirthadipa Pradhan-Sundd, PhD

Department of Medicine

Division of Hematology-Oncology

University of Pittsburgh School of Medicine

E1225 BST, 200 Lothrop Street, Pittsburgh, PA, 15261 Email: [tip9@pitt.edu](mailto:tip9@pitt.edu)

Prithu Sundd, PhD

Department of Medicine

Vascular Medicine Institute

University of Pittsburgh School of Medicine

E1225 BST, 200 Lothrop Street, Pittsburgh, PA, 15261

Email: [prs51@pitt.edu](mailto:prs51@pitt.edu)

## **Table of contents**

Supplemental Table

Supplemental methods

Supplemental Figures and Legends

Supplemental Movie Legends

## Supplemental Table

Table 1:

| Parameter                              | Normal range | SS mice     | SS;Selp <sup>-/-</sup> mice |
|----------------------------------------|--------------|-------------|-----------------------------|
| White Blood Cells, ×10 <sup>9</sup> /L | 1.8-10.7     | 30(±5)      | 42.5 (20.42-63.7) (p=0.01)  |
| Neutrophils, ×10 <sup>9</sup> /L       | 0.1-2.4      | 8(±3)       | 26±5.612 (p=0.01)           |
| Lymphocytes, ×10 <sup>9</sup> /L       | 0.9-9.3      | 18(±2)      | 19.41 (10.36-28.02)         |
| Monocytes, ×10 <sup>9</sup> /L         | 0.0-0.4      | 1.5(±2)     | 3.46±1.202                  |
| Hemoglobin, g/dL                       | 11.0-15.1    | 6.12±0.399  | 7.66±2.699 NS               |
| Hematocrit, %                          | 35.1-45.4    | 26.56±2.057 | 27.16±4.999 NS              |
| Platelets×10 <sup>9</sup> /L           | 592-2972     | 311±60      | 470±90(p=0.01)              |
| Reticulocytes                          | 5.58-9.91    | 62.43±10    | 57.35±6 NS                  |

**Table 1:** Comparison of hematologic data between SS and SS;Selp<sup>-/-</sup> mice. Data shown as mean±SEM for normal distributed data and as median (full range) for skewed distribution. Data are reported for 3 male and 2 female SS mice, 3 male and 3 female of SS;Selp<sup>-/-</sup> mice. Statistical significance was determined using student T test with unequal variances.

### Supplemental Method:

**Immunohistochemistry (IHC) and immunofluorescence (IF):** Tissue sections (4-6µm) were stained with Prussian blue as described elsewhere<sup>15</sup>. We used primary antibodies against P21 (1:100, Santa Cruz), Ki-67 (1:100, ABCAM) and Ly6G (1:100, ABCAM). Nikon A1 Spectral Confocal microscopes were used to capture images at CBI Pitt.

**Western Blot :** Immunoblotting was performed as described elsewhere<sup>15</sup>. The following primary antibodies were used: P21 (1:1000, Santa Cruz), P16 (1:1000, Santa Cruz), Ly6G (1:1000, Abcam), Hcpidin ((1:1000, Cell signaling) and pP53 (1:1000, Cell signaling).

*mRNA isolation and real time polymerase chain reaction:* mRNA was isolated and purified from livers of SS and SS-*Selp*<sup>-/-</sup> mice (n=4/group). mRNA was isolated using Trizol (Invitrogen). RT-PCR was performed as described elsewhere<sup>15</sup>. 18S and GAPDH were used to normalize the mRNA expression data. *Sequences of primers used are added below.*

Sequences of primers used in this study

| <b>Primer</b>   | <b>Forward</b>             | <b>Reverse</b>             |
|-----------------|----------------------------|----------------------------|
| <i>18S</i>      | CGG CTA CCA CAT CCA AGG AA | GCT GGA ATT ACC GCG GCT    |
| <i>GapDH</i>    | AAC TTT GGC ATT GTG GAA GG | ACA CAT TGG GGG TAG GAA CA |
| <i>p16</i>      | GCTCAACTACGGTGCAGATTC      | GCACGATGTCTTGATGTCCC       |
| <i>p21</i>      | CGAGAACGGTGGAACTTTGAC      | CCAGGGCTCAGGTAGACCTT       |
| <i>p53</i>      | AGA GTC TAT AGG CCC ACC CC | GCT CGA CGC TAG GAT CTG AC |
| <i>HO-1</i>     | CCTTCCCGAACATCGACAGCC      | GCAGCTCCTCAAACAGCTCAA      |
| <i>CD11b</i>    | AAACCACAGTCCC GCAGAGA      | CGTGTTACCAGCTGGCTTA        |
| <i>Ki-67</i>    | AGAGCCTTAGCAATAGCAACG      | GTCTCCCGCGATTCCTCTG        |
| <i>TIMP1</i>    | AGGTGGTCTCGTTGATTTCT       | GTAAGGCCTGTAGCTGTGCC       |
| <i>ly6g</i>     | TGCGTTGCTCTGGAGATAGA       | CAGAGTAGTGGGGCAGATGG       |
| <i>CD62L</i>    | CTAATTTCCCCTCGCTGATTCAT    | GCATTAGCTTCTGTGCTGAATTGA   |
| <i>Coll1a1</i>  | CATGTTTCAGCTTTGTGGACCT     | GCAGCTGACTTCAGGGATGT       |
| <i>mCXCR2</i>   | GGCGGGGTAAGACAAGAA TC      | GGCAAGGTCAGGGCAAAGAA       |
| <i>Hepcidin</i> | TGTCTCCTGCTTCTCCTCCT       | CTCTGTAGTCTGTCTCATCTGTTG   |

*Measurement of lactate dehydrogenase:* LDH activity in blood serum and liver homogenate of control, SS and SS; *Selp*<sup>-/-</sup> was determined by a colorimetric kinetic Lactate Dehydrogenase Kit (ABCAM).

*Hematological studies:* Complete blood counts were obtained with a HemaVet blood analyzer (Drew Scientific, Waterbury, CT). The percentage of red fluorescent reticulocytes (Retic %) was measured by flow cytometry at the Vascular Medicine Institute Flow Cytometry Core Facility that is supported by National Institutes of Health at the University of Pittsburgh school of Medicine.

Supplemental Figure and Legends

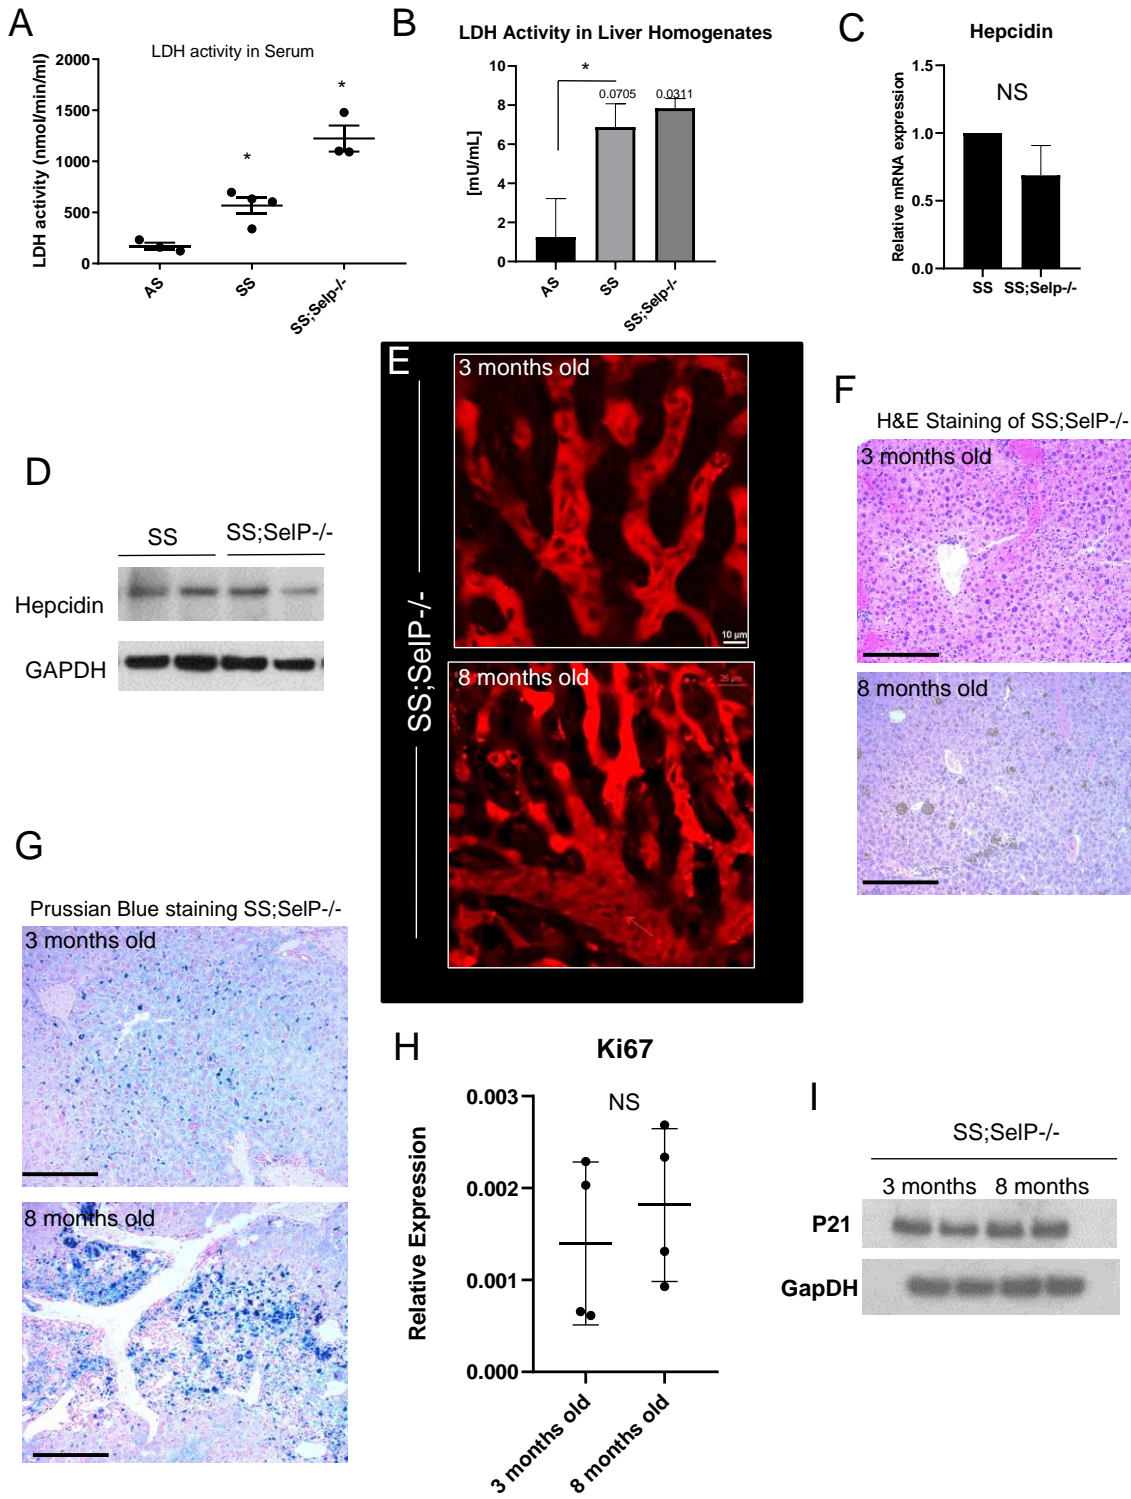

*Figure S1: P-selectin deficiency promotes liver injury in sickle cell disease mice. (A)* Serum lactate dehydrogenase level in AS (control) SS and SS;*Selp*<sup>-/-</sup> mice. Lactate dehydrogenase is significantly upregulated in SS;*Selp*<sup>-/-</sup> mice compared to SS. **(B)** Total liver Lactate dehydrogenase level in AS (control) SS and SS;*Selp*<sup>-/-</sup> mice. Compared to control both SS and SS;*Selp*<sup>-/-</sup> mice show significant increase in liver lactate dehydrogenase level. However, no significant change was seen in between SS and SS;*Selp*<sup>-/-</sup> mice. **(C)** Analysis of mRNA expression by qRT-PCR showed comparable mRNA expression of Hepcidin in SS and SS-*Selp*<sup>-/-</sup> liver. **(D)** Western Blot for hepcidin exhibits comparable expression in SS and SS-*Selp*<sup>-/-</sup> liver. **(E)** qLIM images of 3 and 8 months old SS;*Selp*<sup>-/-</sup> liver injected with TXR-dextran. Comparable amelioration of vasoocclusion was observed. **(F)** H&E staining of SS-*Selp*<sup>-/-</sup> liver showed increased liver injury at 8 months timepoint as compared to 3 months timepoint **(G)** Prussian blue staining for iron showed increased iron deposition in SS-*Selp*<sup>-/-</sup> liver at both 3- and 8-months' time point with significant enrichment of Prussian blue staining at 8 months of age. **(H)** Analysis of mRNA expression by qRT-PCR showed comparable mRNA expression of ki-67 in SS-*Selp*<sup>-/-</sup> liver at both 3- and 8-months' time point. **(D)** Western Blot for P21 exhibits comparable expression in SS-*Selp*<sup>-/-</sup> liver at both 3- and 8-months' time point.

## Supplemental Movie Legends

**Movie S1. Visualization of blood flow in a SCD (SS) mouse after administration of TXR-dextran and CF prior to imaging.** The sinusoids in SCD mouse liver visualized by carotid artery injection of TXR-dextran (red) and CF (green; as a marker for liver bile ducts). Here the blood flow is occluded at a region which appears dark due to lack of flow. Original acquisition rate. Scale bar 20  $\mu$ M.

**Movie S2. Visualization of blood flow in a SCD (SS) mouse after administration of TXR-dextran and CF prior to imaging.** The sinusoids in SCD mouse liver visualized by carotid artery injection of TXR-dextran (red) and CF (green; as a marker for liver bile ducts). Here the blood flow is occluded at various regions which appears dark due to lack of flow. Original acquisition rate. Scale bar 20  $\mu$ M.

**Movie S3. Visualization of blood flow in a SCD (SS) mouse after administration of TXR-dextran and CF prior to imaging.** The sinusoids in SCD mouse liver visualized by carotid artery injection of TXR-dextran (red) and CF (green; as a marker for liver bile ducts). Here the blood flow is occluded at regions which appears dark due to lack of flow. Original acquisition rate. Scale bar 20  $\mu$ M.

**Movie S4. Visualization of blood flow in a SS-Selp<sup>-/-</sup> mouse after administration of TXR-dextran and CF prior to imaging.** The sinusoids in SS-Selp<sup>-/-</sup> mouse liver visualized by carotid artery injection of TXR-dextran (red) and CF (green; as a marker for liver bile ducts). Here the blood flow appears continuous. Original acquisition rate. Scale bar 20  $\mu$ M.



***Movie S5. Visualization of blood flow in a SS-Selp<sup>-/-</sup> mouse after administration of TXR-dextran and CF prior to imaging.*** The sinusoids in SS-Selp<sup>-/-</sup> mouse liver visualized by carotid artery injection of TXR-dextran (red) and CF (green; as a marker for liver bile ducts). Here the blood flow appears continuous. Original acquisition rate. Scale bar 20 uM.

***Movie S6. Visualization of blood flow in a SS-Selp<sup>-/-</sup> mouse after administration of TXR-dextran and CF prior to imaging.*** The sinusoids in SS-Selp<sup>-/-</sup> mouse liver visualized by carotid artery injection of TXR-dextran (red) and CF (green; as a marker for liver bile ducts). Here the blood flow appears continuous. A small region with vasoocclusion is seen (marked by \*). Original acquisition rate. Scale bar 20 uM.

***Movie S7. Visualization of blood flow in a SS-Selp<sup>-/-</sup> mouse at 3 months of age after administration of TXR-dextran prior to imaging.*** The sinusoids in SS-Selp<sup>-/-</sup> mouse liver visualized by carotid artery injection of TXR-dextran (red). Here the blood flow appears continuous. Original acquisition rate. Scale bar 20 uM.

***Movie S8. Visualization of blood flow in a SS-Selp<sup>-/-</sup> mouse at 8 months of age after administration of TXR-dextran prior to imaging.*** The sinusoids in SS-Selp<sup>-/-</sup> mouse liver visualized by carotid artery injection of TXR-dextran (red). Here the blood flow appears continuous. Original acquisition rate. Scale bar 20 uM.
